# Supplementary material for: Ancestry, admixture and fitness in Colombian genomes
Source: PubMed Central journal article supplement (PMC4508918; doi:10.1038/srep12376), 2015-07-21
Supplement: srep12376-s1.pdf [file srep12376-s1.pdf]

Supplementary Information for:

## Ancestry, admixture and selection in Colombian genomes

Lavanya Rishishwar<sup>1,2,3,†</sup>, Andrew B. Conley<sup>1,†</sup>, Charles H. Wigington<sup>1</sup>, Lu Wang<sup>1</sup>, Augusto Valderrama-Aguirre<sup>2,4,5</sup> and I. King Jordan<sup>1,2,3,\*</sup>

<sup>1</sup>School of Biology, Georgia Institute of Technology, Atlanta, GA 30332, USA

<sup>2</sup>PanAmerican Bioinformatics Institute, Cali, Valle del Cauca, Colombia

<sup>3</sup>BIOS Center de Bioinformática y Biología Computacional, Manizales, Caldas, Colombia

<sup>4</sup>Biomedical Research Institute, Universidad Libre, Cali, Valle del Cauca, Colombia

<sup>5</sup>Regenerar - Center of Excellence for Regenerative and Personalized Medicine, Valle del Cauca, Colombia

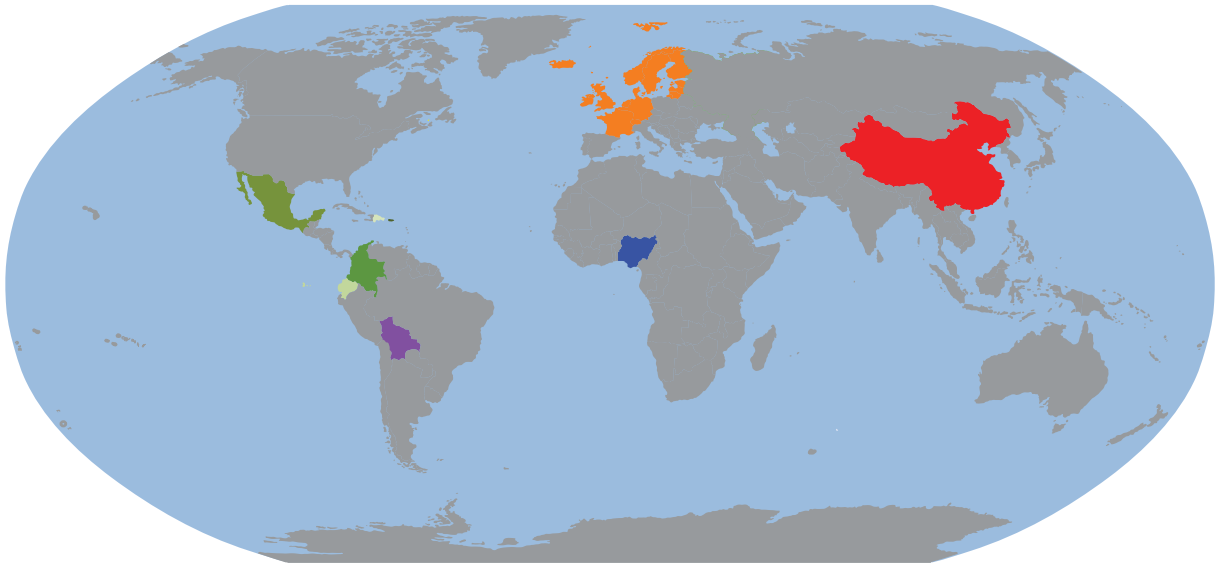

***Ancestral Populations from Around the World***

| Name               | Color  | Ancestral Origin          | n  | Source (PMID) | Platform                |
|--------------------|--------|---------------------------|----|---------------|-------------------------|
| CEU                | Orange | Northern & Western Europe | 85 | 23128226      | Whole genome sequencing |
| CHB                | Red    | Beijing, China            | 92 | 23128226      | Whole genome sequencing |
| Totonac & Bolivian | Purple | Mexico & Bolivia          | 45 | 22606979      | SNP microarray          |
| YRI                | Blue   | Nigeria                   | 87 | 23128226      | Whole genome sequencing |

***Admixed Populations from the Americas***

| Name                 | Color       | Country            | n   | Source (PMID) | Platform                           |
|----------------------|-------------|--------------------|-----|---------------|------------------------------------|
| CLM                  | Green       | Medellin, Colombia | 60  | 23128226      | Whole genome sequencing            |
| Colombian            | Green       | Colombia           | 26  | 20445096      | Illumina 610K array                |
| Dominican Republican | Light Green | Dominican Republic | 27  | 20445096      | Illumina 610K array                |
| Ecuador              | Light Green | Ecuador            | 20  | 20445096      | Illumina 610K array                |
| Mexican              | Green       | Mexico             | 112 | 20445096      | Affymetrix GeneChip 500K Array Set |
| Puerto Rican         | Dark Green  | Puerto Rico        | 27  | 20445096      | Illumina 610K array                |

S1 Figure. World-wide source of genome sequence and genotype data analyzed in this study. The global locations of putative ancestral populations are shown – African (blue), Asian (red), European (orange) and Native American (purple) – along with the locations of admixed American populations (green). Information on the source populations, number of samples, supporting publication and genome characterization platform is provided.

Note: The global map shown here was modified from [http://commons.wikimedia.org/wiki/File:World\\_Map\\_Blank\\_-\\_with\\_blue\\_sea.svg](http://commons.wikimedia.org/wiki/File:World_Map_Blank_-_with_blue_sea.svg), which has been released into the public domain and thus free to be used by anyone for any purpose.

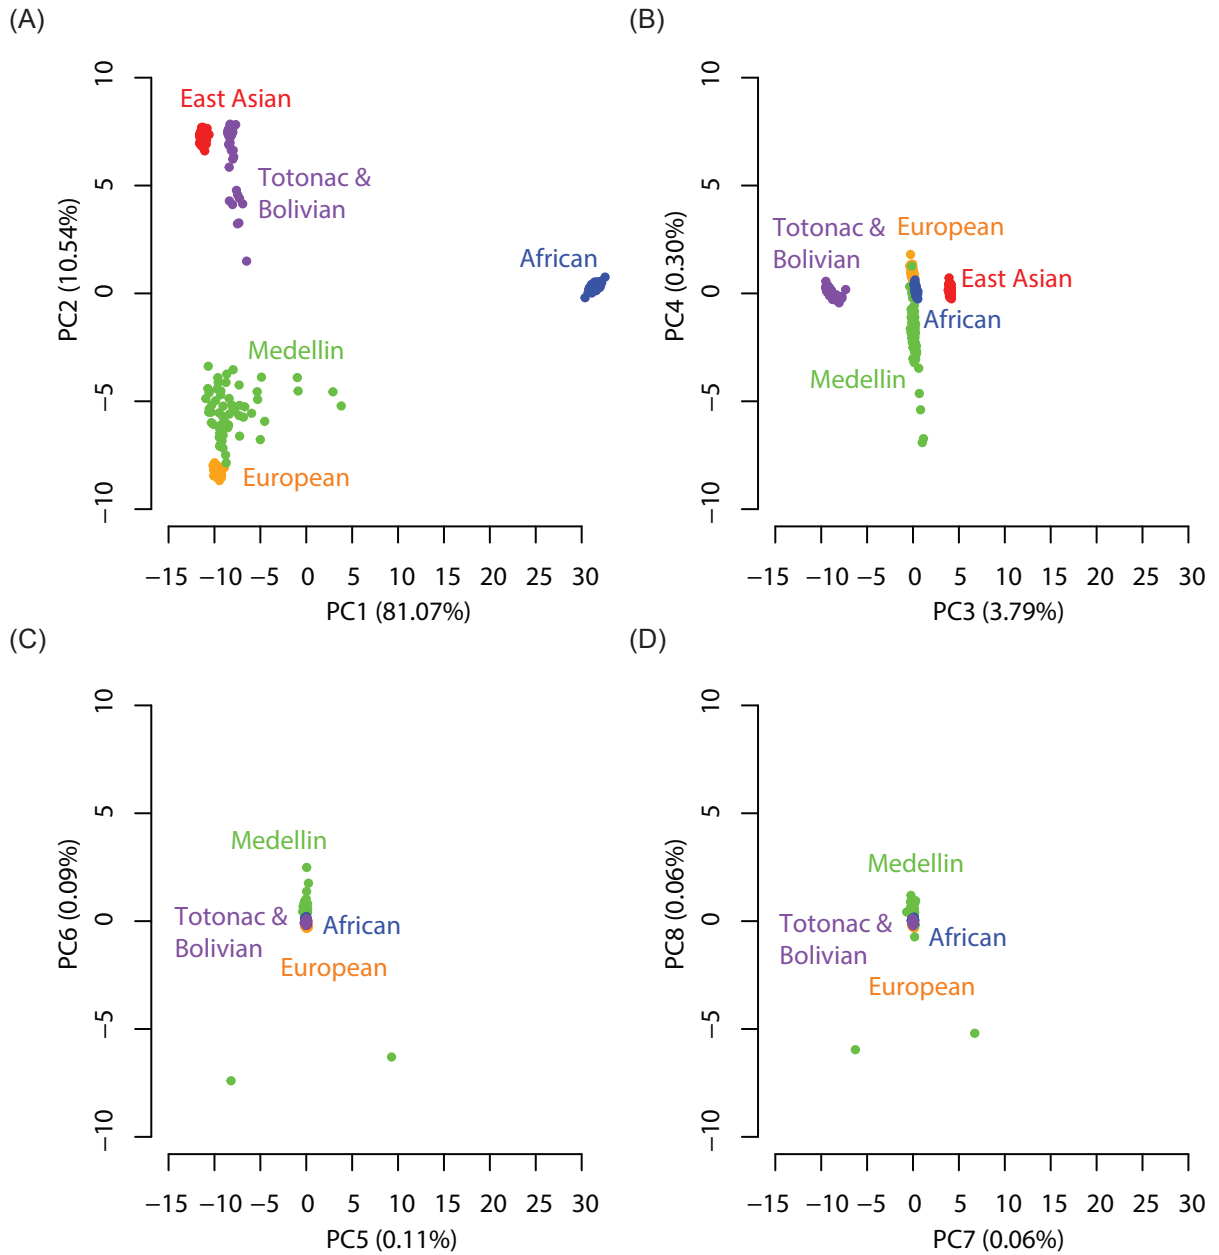

S2 Figure. PCA of pairwise allele sharing distances among admixed Colombian genomes from Medellin compared to putative ancestral populations from Africa, the Americas, Asia and Europe. The panels have comparisons of the successive principal components (PCs): (A) PC1-PC2, (B) PC3-PC4, (C) PC5-PC6 and (D) PC7-PC8.

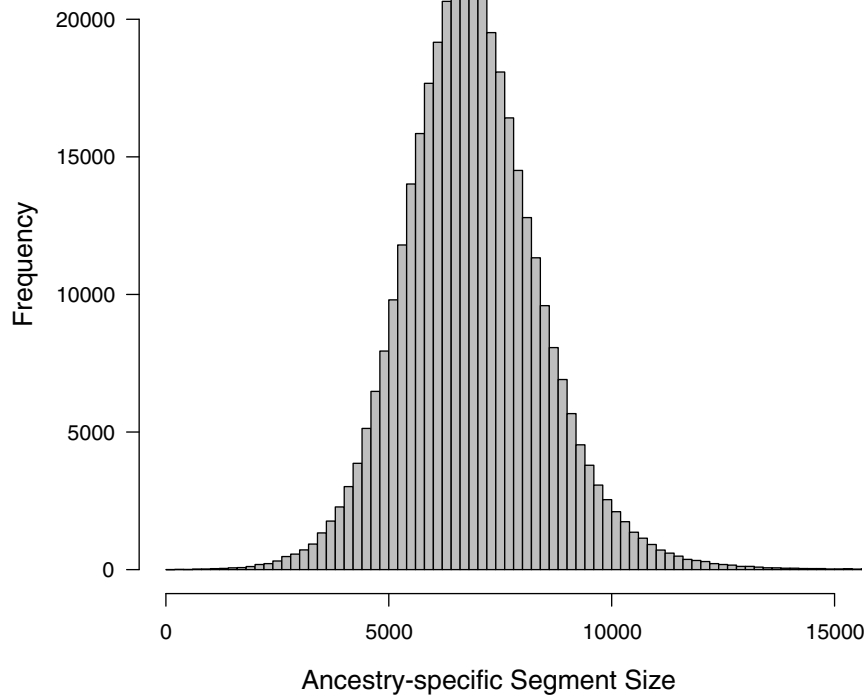

S3 Figure. Size distribution of the ancestry-specific chromosomal segments used for the ancestry enrichment analysis.

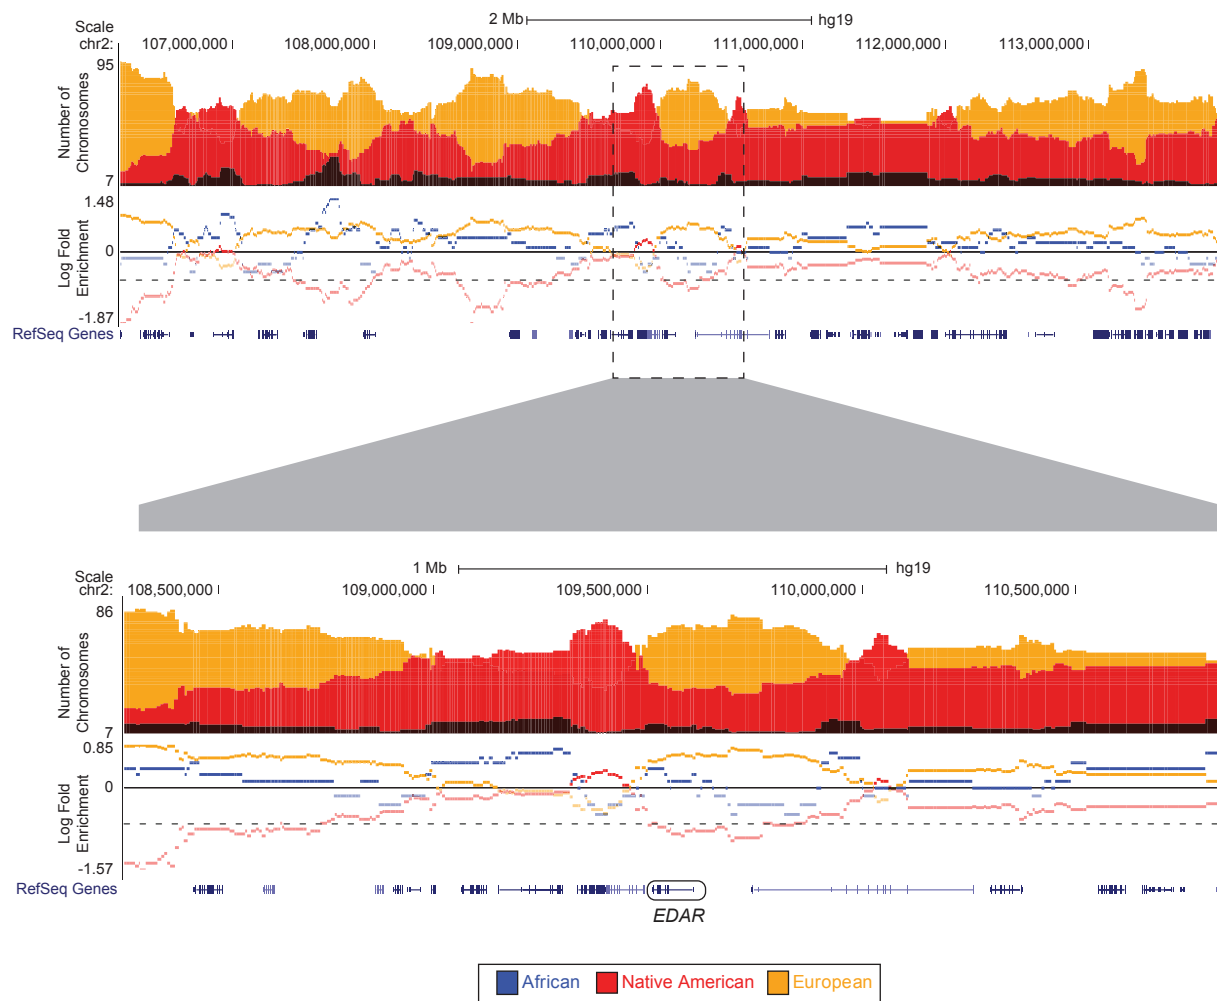

S4 Figure. Example of an Asian (American)-depleted region found at the *EDAR* locus. Population-wide chromosome counts from the three ancestry-components are shown above the genomic axis and log-fold enrichment values (observed counts/genomic average counts) for the ancestry components are shown below the axis. The upper panel shows a ~7Mb region surrounding the locus on chromosome 2, and the lower panel shows a zoomed in view centered on the Asian (American) ancestry-depleted gene *EDAR*.
